# Supplementary material for: Polylactic Acid/Poly(vinylpyrrolidone) Co-Electrospun Fibrous Membrane as a Tunable Quercetin Delivery Platform for Diabetic Wounds
Source: MDPI journal article supplement (doi:10.3390/pharmaceutics15030805), 2023-03-01

# Poly(lactic acid)/poly(vinylpyrrolidone) co-electrospun fibrous membrane as a tunable quercetin delivery platform for diabetic wounds

Francesca Di Cristo <sup>1,#</sup>, Anna Valentino <sup>2,#</sup>, Ilenia De Luca <sup>2</sup>, Gianfranco Peluso <sup>2,3</sup>, Irene Bonadies <sup>4,\*</sup>, Anna Di Salle <sup>2</sup>, and Anna Calarco <sup>2,\*</sup>

<sup>1</sup> Elleva Pharma s.r.l. via P. Castellino, 111 – 80131 Naples, Italy

<sup>2</sup> Research Institute on Terrestrial Ecosystems (IRET)—CNR, Via Pietro Castellino 111, 80131 Naples, Italy

<sup>3</sup> UniCamillus, International Medical University, 00131 Rome, Italy

<sup>4</sup> Institute of Polymers, Composites and Biomaterials (IPCB-CNR) Via Campi Flegrei, 34, 80078 Pozzuoli (NA), Italy

\* Correspondence: irene.bonadies@cnr.it (I.B.); anna.calarco@cnr.it (A.C.)

# These authors contributed equally to this work.

**Table S1.** Primers used for RT-qPCR.

| <i>Gene</i>                    | <i>Accession<br/>Number</i> | <i>Forward (5'-3')</i> | <i>Reverse (5'-3')</i>    |
|--------------------------------|-----------------------------|------------------------|---------------------------|
| <i>TNF-<math>\alpha</math></i> | NM_000594.4                 | AACATCCAACCTTCCCAAACGC | TGGTCTCCAGATTCCAGATGTCAGG |
| <i>IL-1<math>\beta</math></i>  | NM_000576.3                 | TCCAGCTACGAATCTCCGAC   | GCATCTTCCTCAGCTTGTCC      |
| <i>IL-6</i>                    | NM_000600.5                 | CGCCTTCGGTCCAGTTGCC    | GCCAGTGCCTCTTTGCTGCTTT    |
| <i>IL-10</i>                   | NM_000572.3                 | TGTTTTCCCTGACCTCCCTC   | GCTCCCTGGTTTCTCTTCCT      |
| <i>IL-12</i>                   | NM_002187.3                 | CAGAGGGGACAACAAGGAGT   | CTTGAGCTTGTGAACGGCAT      |
| <i>CCL18</i>                   | NM_002988.4                 | TCAAGATGACGCTGCAATGC   | CTTAGCCCAAAACCCAGCAC      |
| <i>CD206</i>                   | NM_002438.4                 | ACCAGTTCCTTGACCTCAGG   | ATATCGGAAAGGACTGCGGT      |
| <i>SOD</i>                     | NM_000454.4                 | CCAGTGCAGGGCATCATCAA   | TCTTCATCCTTTGGCCACC       |
| <i>CAT</i>                     | NM_001752.3                 | CGGACATGGTCTGGGACTTC   | AACTGCCTCCCCATTTGCAT      |
| <i>ACTB</i>                    | NM_001101.5                 | ACTCTTCCAGCCTTCCTTCC   | CGTACAGGTCTTTGCGGATG      |

**Figure S1.** Elements analysis by scanning electron microscopy-energy dispersive X-ray spectrometry (SEM-EDX) of PP and PP/Q<sub>x</sub> samples (All results in weight %).

|                       |             |             |
|-----------------------|-------------|-------------|
| <b>Spectrum PP</b>    | <b>C</b>    | <b>O</b>    |
| Mean                  | 54.96       | 45.04       |
| <i>Std. deviation</i> | <i>1.13</i> | <i>1.13</i> |

  

|                                  |             |             |
|----------------------------------|-------------|-------------|
| <b>Spectrum PP/Q<sub>5</sub></b> | <b>C</b>    | <b>O</b>    |
| Mean                             | 61.00       | 39.00       |
| <i>Std. deviation</i>            | <i>0.87</i> | <i>0.87</i> |

  

|                                   |             |             |
|-----------------------------------|-------------|-------------|
| <b>Spectrum PP/Q<sub>10</sub></b> | <b>C</b>    | <b>O</b>    |
| Mean                              | 73.63       | 26.37       |
| <i>Std. deviation</i>             | <i>0.47</i> | <i>0.47</i> |

  

|                                   |             |             |
|-----------------------------------|-------------|-------------|
| <b>Spectrum PP/Q<sub>15</sub></b> | <b>C</b>    | <b>O</b>    |
| Mean                              | 68.24       | 31.76       |
| <i>Std. deviation</i>             | <i>1.19</i> | <i>1.19</i> |

**Figure S2.** A. Stress-strain curves of PP/Qx electrospun mats. B. Image of a sample during tensile testing at different elongation percentages

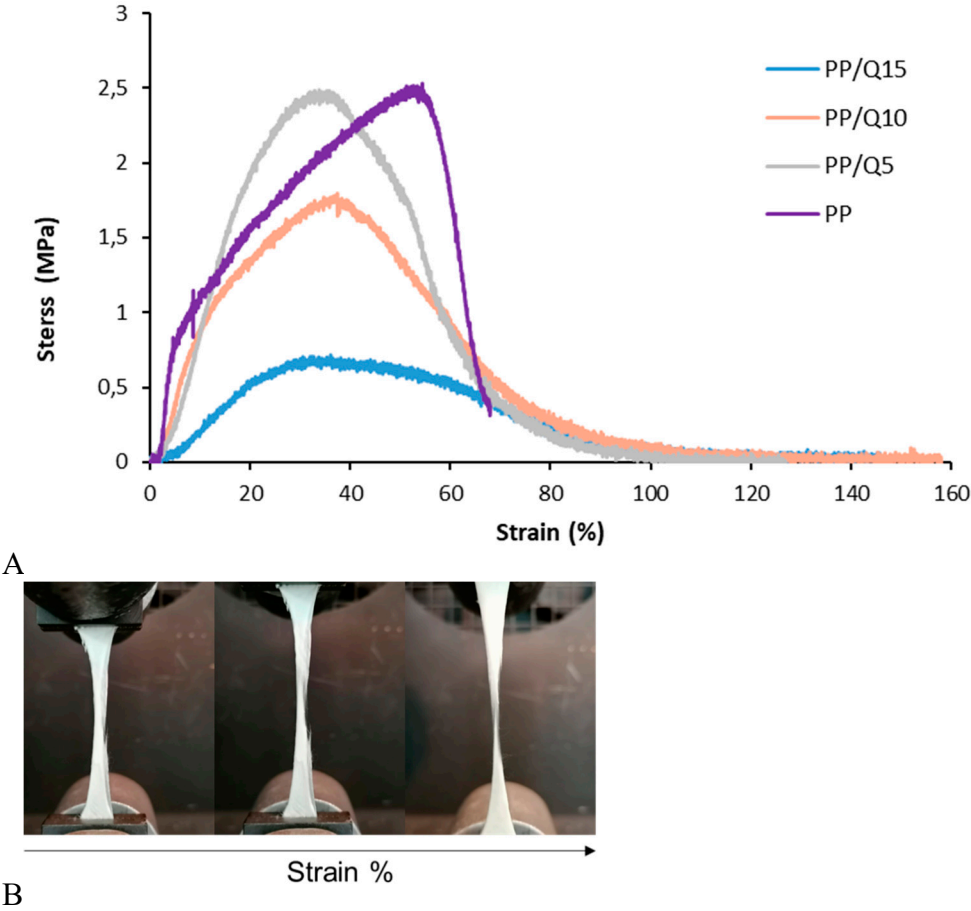

**Figure S3.** Morphological analysis of mats after immersion test: diameter distribution (left) and SEM micrographs (right) at different time intervals

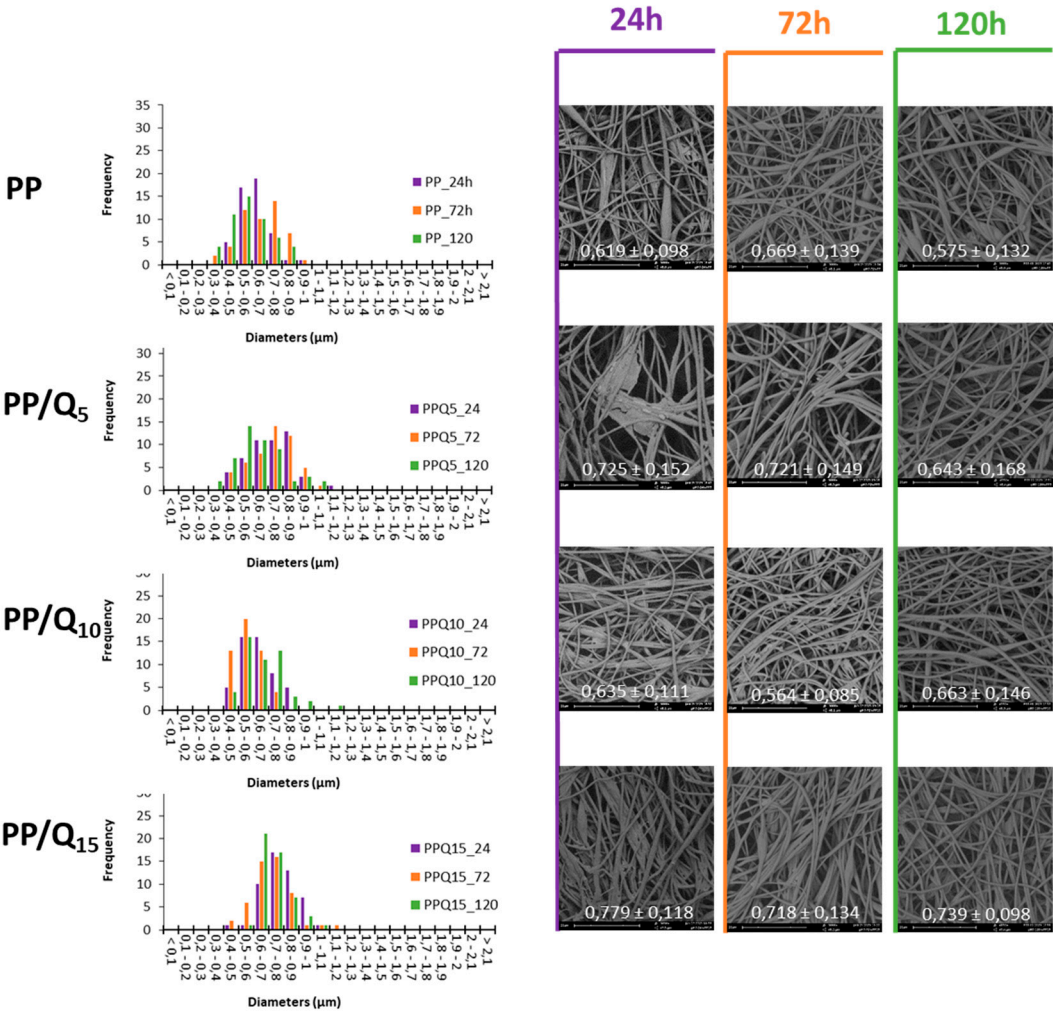

**Figure S4.** ATR spectra of mats before (PP, Quercetin, PLA) and after (PP/Q10) immersion test

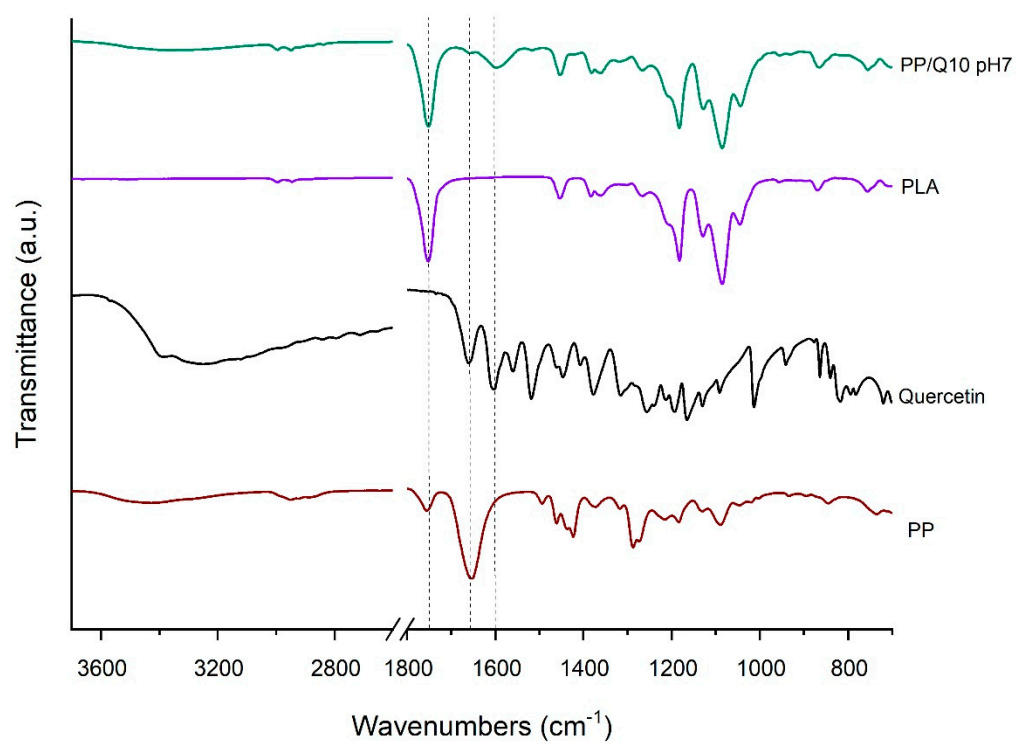

Supplement: s1 [file s1]
